# Supplementary material for: Defining levels of dengue virus serotype-specific neutralizing antibodies induced by a live attenuated tetravalent dengue vaccine (TAK-003)
Source: PubMed Central journal article supplement (PMC7990299; doi:10.1371/journal.pntd.0009258), 2021-03-12
Supplement: pntd.0009258.s002.pdf [file pntd.0009258.s002.pdf]

**S1 Table.** Takeda Vaccine formulations used in DEN-205

| Formulation | FFU/dose        |                 |                 |                 |
|-------------|-----------------|-----------------|-----------------|-----------------|
|             | TDV1            | TDV2            | TDV3            | TDV4            |
| TDV*        | $2 \times 10^4$ | $5 \times 10^3$ | $1 \times 10^5$ | $3 \times 10^5$ |
| HD-TDV      | $2 \times 10^4$ | $5 \times 10^4$ | $1 \times 10^5$ | $3 \times 10^5$ |

\* Used in ongoing Phase 3 trials
