# Supplementary material for: Defining levels of dengue virus serotype-specific neutralizing antibodies induced by a live attenuated tetravalent dengue vaccine (TAK-003)
Source: PubMed Central journal article supplement (PMC7990299; doi:10.1371/journal.pntd.0009258), 2021-03-12
Supplement: pntd.0009258.s003.pdf [file pntd.0009258.s003.pdf]

**S2 Table.** Source of nonhuman primate serum samples

| Study                                                 | Serotype Analyzed | Treatment Group  | N | Vaccination or infection day | Day of serum collection |
|-------------------------------------------------------|-------------------|------------------|---|------------------------------|-------------------------|
| Takeda study<br>DNHP007<br>Tetravalent<br>TDV vaccine | DV1               | One dose TDV     | 4 | 0                            | 180                     |
|                                                       |                   | Two doses TDV    | 4 | 0, 180                       | 180 post dose 2         |
|                                                       |                   | WT DV1 infection | 6 | 0                            | 180                     |
|                                                       | DV2               | One dose TDV     | 4 | 0                            | 180                     |
|                                                       |                   | Two doses TDV    | 4 | 0, 180                       | 180 post dose 2         |
|                                                       |                   | WT DV2 infection | 6 | 0                            | 180                     |
|                                                       | DV3               | One dose TDV     | 4 | 0                            | 180                     |
|                                                       |                   | Two doses TDV    | 4 | 0, 180                       | 180 post dose 2         |
|                                                       |                   | WT DV3 infection | 6 | 0                            | 180                     |
