# Supplementary material for: Defining levels of dengue virus serotype-specific neutralizing antibodies induced by a live attenuated tetravalent dengue vaccine (TAK-003)
Source: PubMed Central journal article supplement (PMC7990299; doi:10.1371/journal.pntd.0009258), 2021-03-12
Supplement: pntd.0009258.s004.pdf [file pntd.0009258.s004.pdf]

**S3 Table.** Source of human serum samples

| <b>Study</b>                                                                               | <b>Serostatus at vaccination</b> | <b>Vaccine (One dose)</b> | <b>N</b> | <b>Day of serum collection</b> |
|--------------------------------------------------------------------------------------------|----------------------------------|---------------------------|----------|--------------------------------|
| Takeda study<br>DEN-205<br>Phase 2 trial<br>Singapore<br>Adults 21-45 Years<br>Old (N=400) | Dengue seronegative              | TV TDV                    | 14       | 180 days post vaccination      |
|                                                                                            |                                  | TV HD-TDV                 | 16       | 180 days post vaccination      |
|                                                                                            | Dengue 1 seropositive            | -                         | 6        | Day 0 pre-vaccination          |
|                                                                                            | Dengue 2 seropositive            | -                         | 8        | Day 0 pre-vaccination          |
