# Supplementary material for: Defining levels of dengue virus serotype-specific neutralizing antibodies induced by a live attenuated tetravalent dengue vaccine (TAK-003)
Source: PubMed Central journal article supplement (PMC7990299; doi:10.1371/journal.pntd.0009258), 2021-03-12
Supplement: pntd.0009258.s005.pdf [file pntd.0009258.s005.pdf]

**S4 Table.** Neut<sub>50</sub> titers in baseline sera from DENV1 and DENV2 immune subjects

|                                  | NEUT <sub>50</sub> TITERS |             |       |       |
|----------------------------------|---------------------------|-------------|-------|-------|
|                                  | DENV1                     | DENV2       | DENV3 | DENV4 |
| <b>DENV1<br/>immune<br/>sera</b> | <b>216</b>                | 79          | 10    | 10    |
|                                  | <b>271</b>                | 85          | 45    | 41    |
|                                  | <b>140</b>                | 50          | 38    | 20    |
|                                  | <b>465</b>                | 20          | 20    | 20    |
|                                  | <b>384</b>                | 43          | 76    | 20    |
|                                  | <b>612</b>                | 59          | 168   | 20    |
| <b>DENV2<br/>immune<br/>sera</b> | 37                        | <b>1512</b> | 20    | 29    |
|                                  | 45                        | <b>1317</b> | 40    | 42    |
|                                  | 39                        | <b>982</b>  | 20    | 41    |
|                                  | 74                        | <b>1024</b> | 105   | 89    |
|                                  | 20                        | <b>553</b>  | 20    | 51    |
|                                  | 56                        | <b>686</b>  | 20    | 53    |
|                                  | 22                        | <b>283</b>  | 20    | 44    |
|                                  | 133                       | <b>285</b>  | 28    | 74    |
