# Supplementary material for: Defining levels of dengue virus serotype-specific neutralizing antibodies induced by a live attenuated tetravalent dengue vaccine (TAK-003)
Source: PubMed Central journal article supplement (PMC7990299; doi:10.1371/journal.pntd.0009258), 2021-03-12
Supplement: pntd.0009258.s006.pdf [file pntd.0009258.s006.pdf]

**S5 Table.** Comparison of Neut50 titers induced after one dose of TDV or HD-TDV in dengue seronegative adults

|            | DV1       |           | DV2        |             | DV3        |           | DV4       |           |
|------------|-----------|-----------|------------|-------------|------------|-----------|-----------|-----------|
|            | TDV       | HD-TDV    | TDV        | HD-TDV      | TDV        | HD-TDV    | TDV       | HD-TDV    |
|            | 69        | 181       | 366        | 2844        | 171        | 94        | 161       | 125       |
|            | 98        | 263       | 283        | 459         | 80         | 481       | 79        | 162       |
|            | 421       | 205       | 789        | 891         | 955        | 1360      | 193       | 88        |
|            | 174       | 172       | 271        | 1187        | 555        | 49        | 234       | 93        |
|            | 94        | 802       | 2319       | 4642        | 4857       | 160       | 163       | 192       |
|            | 81        | 224       | 467        | 3503        | 117        | 650       | 605       | 329       |
|            | 819       | 109       | 2386       | 1203        | 970        | 304       | 1817      | 93        |
|            | 38        | 157       | 66         | 1395        | 74         | 155       | 10        | 259       |
|            | 28        | 50        | 338        | 729         | 104        | 1013      | 10        | 36        |
|            | 10        | 10        | 35         | 952         | 10         | 10        | 10        | 10        |
|            | 32        | 10        | 474        | 227         | 72         | 26        | 85        | 10        |
|            | 10        | 34        | 483        | 1090        | 25         | 10        | 29        | 22        |
|            | 95        | 33        | 41         | 601         | 33         | 80        | 10        | 33        |
|            | 10        | 37        | 564        | 3754        | 10         | 56        | 10        | 10        |
|            |           | 10        |            | 257         |            | 10        |           | 10        |
|            |           | 37        |            | 440         |            | 10        |           | 10        |
| <b>GMT</b> | <b>61</b> | <b>71</b> | <b>336</b> | <b>1032</b> | <b>123</b> | <b>90</b> | <b>65</b> | <b>47</b> |
