# Supplementary material for: Defining levels of dengue virus serotype-specific neutralizing antibodies induced by a live attenuated tetravalent dengue vaccine (TAK-003)
Source: PubMed Central journal article supplement (PMC7990299; doi:10.1371/journal.pntd.0009258), 2021-03-12
Supplement: pntd.0009258.s007.pdf [file pntd.0009258.s007.pdf]

**S6 Table.** Post-depletion Neut50 titers and depletion efficiencies in DEN-205 seronegative subjects after TAK-003 vaccination

| DENV-1              |                                |                                  |                          | DENV-2              |                                |                                  |                          | DENV-3              |                                |                                  |                          | DENV-4              |                                |                                  |                          |
|---------------------|--------------------------------|----------------------------------|--------------------------|---------------------|--------------------------------|----------------------------------|--------------------------|---------------------|--------------------------------|----------------------------------|--------------------------|---------------------|--------------------------------|----------------------------------|--------------------------|
| Neut50              |                                |                                  | % DV1<br>Abs<br>Depleted | Neut50              |                                |                                  | % DV2<br>Abs<br>Depleted | Neut50              |                                |                                  | % DV3<br>Abs<br>Depleted | Neut50              |                                |                                  | % DV4<br>Abs<br>Depleted |
| CONTROL<br>Depleted | HOMOL.<br>SEROTYPE<br>Depleted | HETEROL.<br>SEROTYPE<br>Depleted |                          | CONTROL<br>Depleted | HOMOL.<br>SEROTYPE<br>Depleted | HETEROL.<br>SEROTYPE<br>Depleted |                          | CONTROL<br>Depleted | HOMOL.<br>SEROTYPE<br>Depleted | HETEROL.<br>SEROTYPE<br>Depleted |                          | CONTROL<br>Depleted | HOMOL.<br>SEROTYPE<br>Depleted | HETEROL.<br>SEROTYPE<br>Depleted |                          |
|                     | (DV1+DV3)*                     | (DV2+DV4)*                       |                          |                     | (DV2+DV4)                      | (DV1+DV3)                        |                          | (DV1+DV3)           | (DV2+DV4)                      |                                  |                          | (DV2+DV4)           | (DV1+DV3)                      |                                  |                          |
| 181                 | 10                             | 26                               | 94                       | 2844                | 333                            | 423                              | 88                       | 94                  | 10                             | 10                               | 89                       | 125                 | 10                             | 10                               | 92                       |
| 69                  | 10                             | 22                               | 86                       | 366                 | 57                             | 466                              | 84                       | 171                 | 25                             | 53                               | 85                       | 161                 | 80                             | 95                               | 50                       |
| 98                  | 10                             | 10                               | 90                       | 283                 | 10                             | 10                               | 96                       | 80                  | 10                             | 10                               | 88                       | 79                  | 10                             | 10                               | 87                       |
| 421                 | 10                             | 29                               | 98                       | 789                 | 21                             | 10                               | 97                       | 955                 | 96                             | 381                              | 90                       | 193                 | 39                             | 45                               | 80                       |
| 174                 | 10                             | 10                               | 94                       | 271                 | 10                             | 20                               | 96                       | 555                 | 10                             | 10                               | 98                       | 234                 | 20                             | 37                               | 91                       |
| 94                  | 10                             | 33                               | 89                       | 2319                | 1161                           | 1887                             | 50                       | 4857                | 10                             | 10                               | 100                      | 163                 | 50                             | 50                               | 69                       |
| 263                 | 10                             | 10                               | 96                       | 459                 | 29                             | 184                              | 94                       | 481                 | 10                             | 10                               | 98                       | 162                 | 10                             | 10                               | 94                       |
| 205                 | 10                             | 27                               | 95                       | 891                 | 107                            | 195                              | 88                       | 1360                | 24                             | 25                               | 98                       | 88                  | 24                             | 10                               | 73                       |
| 172                 | 10                             | 10                               | 94                       | 1187                | 528                            | 353                              | 56                       | 49                  | 10                             | 10                               | 80                       | 93                  | 10                             | 10                               | 89                       |
| 802                 | 10                             | 68                               | 99                       | 4642                | 221                            | 261                              | 95                       | 160                 | 10                             | 10                               | 94                       | 192                 | 27                             | 47                               | 86                       |
| 81                  | 10                             | 10                               | 88                       | 467                 | 28                             | 294                              | 94                       | 117                 | 10                             | 10                               | 91                       | 605                 | 417                            | 441                              | 31                       |
| 224                 | 31                             | 25                               | 86                       | 3503                | 160                            | 1177                             | 95                       | 650                 | 10                             | 10                               | 98                       | 329                 | 62                             | 77                               | 81                       |
| 109                 | 10                             | 10                               | 91                       | 1203                | 116                            | 522                              | 90                       | 304                 | 10                             | 10                               | 97                       | 93                  | 28                             | 30                               | 70                       |
| 157                 | 10                             | 45                               | 94                       | 1395                | 262                            | 1441                             | 81                       | 155                 | 10                             | 10                               | 94                       | 259                 | 79                             | 37                               | 69                       |
| 819                 | 10                             | 120                              | 99                       | 2386                | 234                            | 256                              | 90                       | 970                 | 10                             | 45                               | 99                       | 1817                | 176                            | 937                              | 90                       |
| 38                  | 10                             | 27                               | 73                       | 66                  | 10                             | 10                               | 85                       | 74                  | 10                             | 10                               | 86                       | 10                  | 10                             | 10                               | 0                        |
| 50                  | 10                             | 34                               | 80                       | 729                 | 82                             | 225                              | 89                       | 1013                | 10                             | 102                              | 99                       | 36                  | 22                             | 33                               | 40                       |
| 28                  | 10                             | 10                               | 65                       | 338                 | 35                             | 315                              | 90                       | 104                 | 22                             | 95                               | 79                       | 10                  | 10                             | 10                               | 0                        |
| 10                  | 10                             | 10                               | 0                        | 35                  | 21                             | 10                               | 38                       | 10                  | 10                             | 10                               | 0                        | 10                  | 10                             | 10                               | 0                        |
| 10                  | 10                             | 10                               | 0                        | 952                 | 131                            | 225                              | 86                       | 10                  | 10                             | 10                               | 0                        | 10                  | 10                             | 27                               | 0                        |
| 10                  | 10                             | 10                               | 0                        | 227                 | 106                            | 407                              | 53                       | 26                  | 10                             | 42                               | 61                       | 10                  | 10                             | 10                               | 0                        |
| 34                  | 10                             | 69                               | 70                       | 1090                | 137                            | 1036                             | 87                       | 10                  | 10                             | 10                               | 0                        | 22                  | 10                             | 10                               | 54                       |
| 32                  | 10                             | 10                               | 69                       | 474                 | 156                            | 819                              | 67                       | 72                  | 10                             | 31                               | 86                       | 85                  | 10                             | 55                               | 88                       |
| 10                  | 10                             | 10                               | 0                        | 483                 | 58                             | 177                              | 88                       | 25                  | 10                             | 10                               | 59                       | 29                  | 10                             | 10                               | 66                       |
| 33                  | 10                             | 10                               | 70                       | 601                 | 187                            | 567                              | 69                       | 80                  | 10                             | 22                               | 88                       | 33                  | 10                             | 10                               | 70                       |
| 95                  | 10                             | 51                               | 89                       | 41                  | 25                             | 23                               | 38                       | 33                  | 10                             | 24                               | 70                       | 10                  | 10                             | 10                               | 0                        |
| 37                  | 24                             | 30                               | 35                       | 3754                | 630                            | 1079                             | 83                       | 56                  | 41                             | 10                               | 27                       | 10                  | 10                             | 10                               | 0                        |
| 10                  | 22                             | 10                               | 0                        | 564                 | 266                            | 429                              | 53                       | 10                  | 10                             | 10                               | 0                        | 10                  | 10                             | 10                               | 0                        |
| 10                  | 10                             | 10                               | 0                        | 257                 | 21                             | 300                              | 92                       | 10                  | 10                             | 10                               | 0                        | 10                  | 10                             | 10                               | 0                        |
| 37                  | 10                             | 10                               | 73                       | 440                 | 76                             | 323                              | 83                       | 10                  | 10                             | 10                               | 0                        | 10                  | 10                             | 10                               | 0                        |

\* DENV used in depletion
